# Supplementary material for: Multiplexed energy transfer mechanisms in a dual-function quantum dot for zinc and manganese
Source: Royal Society of Chemistry journal article supplement (doi:10.1039/b814879a), 2008-11-24
Supplement: b814879a.pdf [file b814879a.pdf]

## SUPPORTING INFORMATION

### Multiplexed energy transfer mechanisms in a dual function quantum dot for zinc and manganese

Maria Jose Ruedas-Rama, Elizabeth A. H. Hall\*

Institute of Biotechnology, Department of Chemical Engineering and Biotechnology,  
University of Cambridge, Tennis Court Road, Cambridge CB2 1QT, United Kingdom

#### Calculations

##### Quantum Yield

The quantum yield of QD<sub>540</sub> and QD<sub>620</sub> was estimated from Eq. (1):

$$\phi_S = \phi_R \frac{A_R(\lambda_R) n_S^2 I_S}{A_S(\lambda_S) n_R^2 I_R}$$

where  $\phi_R$  is the quantum yield of the reference,  $A_S(\lambda_S)$  is the absorbance of the sample (QD) and  $A_R(\lambda_R)$  the absorbance of a reference solution at the excitation wavelength,  $n_S$  and  $n_R$  are the refractive index of the medium of the sample and the reference, respectively, and  $I_S$  and  $I_R$  the area under the emission spectrum of sample and reference, respectively.

The quantum yield of the QD<sub>540</sub> and QD<sub>620</sub> were calculated by using fluorescein ( $\phi_R = 0.95$ )<sup>1</sup> and rhodamine B ( $\phi_R = 0.31$ )<sup>2</sup> as reference in aqueous solution, respectively. For the calculation of the quantum yield of QD<sub>540</sub> the excitation wavelength used to obtain the emission spectra was 450 nm, and for QD<sub>620</sub> was 520 nm.  $A_S(\lambda_S)$  and  $A_R(\lambda_R)$  were the values of absorbance at these wavelengths, respectively. The experimental calculated quantum yields were 0.22 and 0.25 for QD<sub>540</sub> and QD<sub>620</sub>, respectively

### Resonance Energy Transfer

The resonance energy transfer (RET) efficiency depends on many parameters, such as the distance between the donor and the acceptor; the spectral overlap of the donor emission spectrum and the acceptor absorption spectrum; and the relative orientation of the donor emission dipole moment and the acceptor absorption dipole moment. The efficiency depends on the donor-to-acceptor separation distance  $r$  with an inverse 6th power law due to the dipole-dipole coupling mechanism<sup>1</sup>:

$$E = \frac{1}{1 + (r/R_0)^6}$$

being  $R_0$  the distance between the donor and acceptor that yields 50 % energy-transfer efficiency. To characterize the RET process between QDs and the complex zincon-Zn<sup>2+</sup>, the Förster distance,  $R_0$ , can be calculated as<sup>1</sup> (Eq (3)):

$$R_0^6 = 8.8 \times 10^{23} \cdot \kappa^2 \cdot n_D^{-4} \cdot Q_D \cdot J$$

where  $Q_D$  is the quantum yield of the donor in the absence of acceptor,  $n_D$  is the refractive index of the medium, and  $\kappa^2$  is an orientation factor, depending on the relative orientation of the donor and acceptor dipoles.  $\kappa^2 = 2/3$  is the value for randomly orientation dipoles. The overlap integral  $J$  is a quantitative measure of donor-acceptor spectral overlap integrated over all wavelengths  $\lambda$ , and is defined as<sup>1</sup>:

$$J = \int f_D(\lambda) \varepsilon_A(\lambda) \lambda^4 d\lambda$$

where  $f_D$  and  $\varepsilon_A$  represent the donor emission spectrum (normalized and dimensionless) and acceptor absorption spectrum, respectively.

By using our experimental data, the  $R_0$  values obtained for QD<sub>540</sub>-zincon-Zn<sup>2+</sup> and QD<sub>620</sub>-zincon-Zn<sup>2+</sup> pairs were 41.5 and 47.6 Å, respectively.

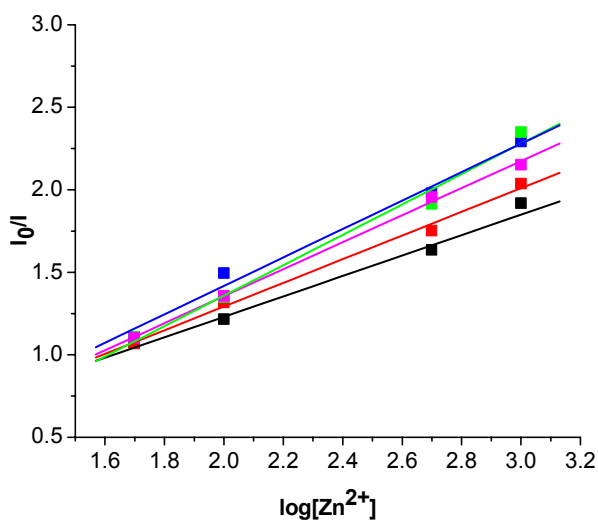

**Figure SI.1.** Response of QD<sub>540</sub>-zincon conjugates toward Zn<sup>2+</sup> at different ionic strengths. TRIS buffer concentration (pH 7.5): 5mM (black), 10 mM (red), 25 mM (blue), 50 mM (green), and 100 mM (pink).

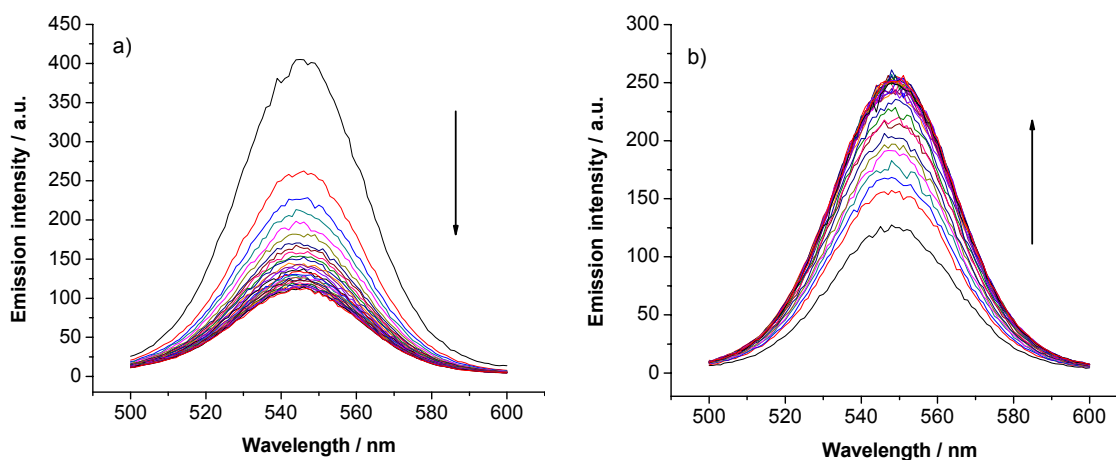

**Figure SI-2.** Response of QD<sub>540</sub>-zincon conjugates towards a) Zn<sup>2+</sup> and b) Mn<sup>2+</sup> (TRIS pH 7.5) with time. Every spectrum was scanned every 20 seconds.

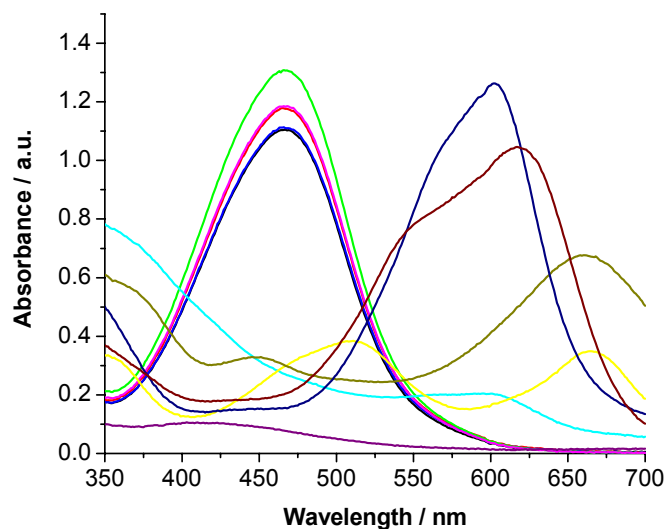

**Figure SI.3.** Absorption spectra of zincon before (black) and after addition of different metal ion in solution (TRIS pH 7.5): Ca<sup>2+</sup> (red), Mg<sup>2+</sup> (blue), K<sup>+</sup> (green), Na<sup>+</sup> (pink), Fe<sup>2+</sup> (cyan), Ni<sup>2+</sup> (yellow), Co<sup>2+</sup> (dark yellow), Cu<sup>2+</sup> (dark blue), Mn<sup>2+</sup> (purple), and Zn<sup>2+</sup> (brown).

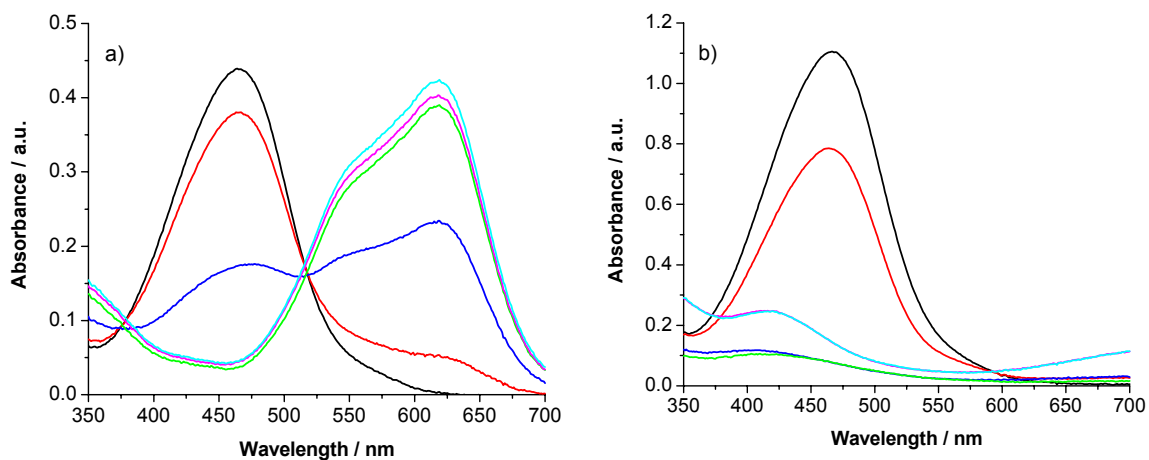

**Figure SI-4.** Absorption spectra of zincon (black) and a) zincon-Zn<sup>2+</sup> complex, and b) zincon-Mn<sup>2+</sup> complex in solution at different pHs. pH: 6.2 (red), 7.0 (blue), 7.5 (green), 8.2 (pink) and 8.8 (cyan).

## REFERENCES

---

<sup>1</sup> J.R. Lakowicz, Principles of Fluorescence Spectroscopy, 2nd Ed., Kluwer Academic/Plenum Publishers, New York, London, Moscow, Dordrecht, 1999.

<sup>2</sup> D. Magde, G.E. Rojas, and P. Seybold, Solvent Dependence of the Fluorescence Lifetimes of Xanthene Dyes. Photochem. Photobiol. 70, 737, 1999.
